# Supplementary material
Source: Springer Nature journal article supplement (https://www.springermedizin.de/resource/supplementary/12875_2005_139_MOESM2_ESM.pdf/9436514)
Supplement: MOESM2 [file 9436514]

# Categories of research experience

## Category 1 - Non-participants

Practitioners who have not participated in research, new researchers with little or no previous experience in research

## Category 2 – Participants

Practitioners participating in research as part of a research team

## Category 3 - Managers and trainers

Practitioners managing their own research project or in formal training to do so

## Category 4 – Academics

Researchers with or leading towards a doctoral degree
